# Supplementary material
Source: PubMed Central journal article supplement (PMC2822506)

A

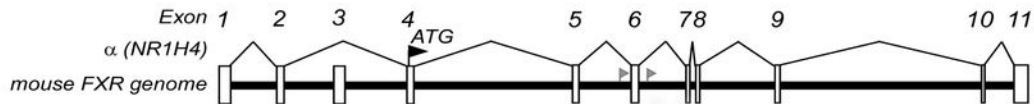

B

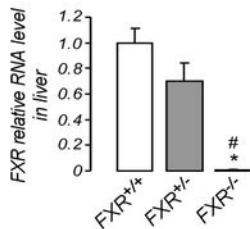

\* $p < 0.001$  (vs +/+)

# $p < 0.01$  (vs +/-)

C

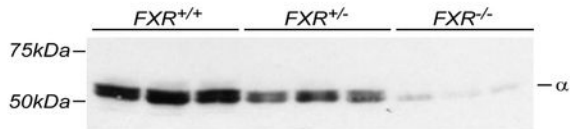

Supplement: figS1.pdf [file figS1.pdf]

# Supplementary Figure 2

A

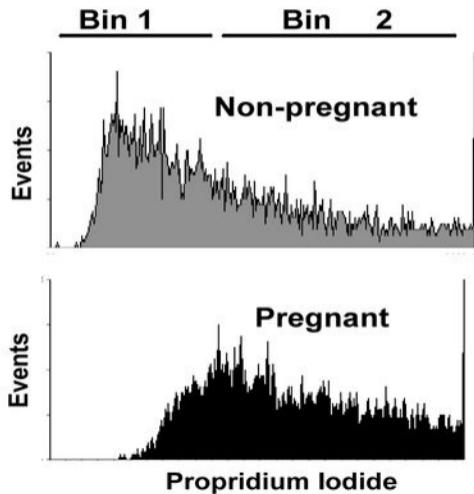

B

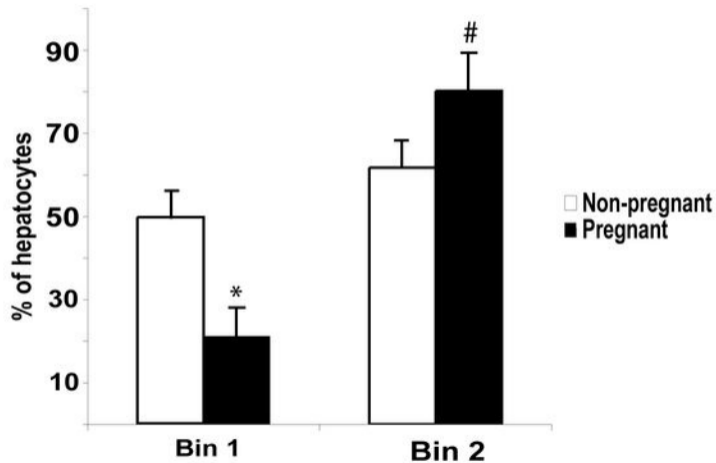

Supplement: figS2.pdf [file figS2.pdf]

Supplementary Figure 3

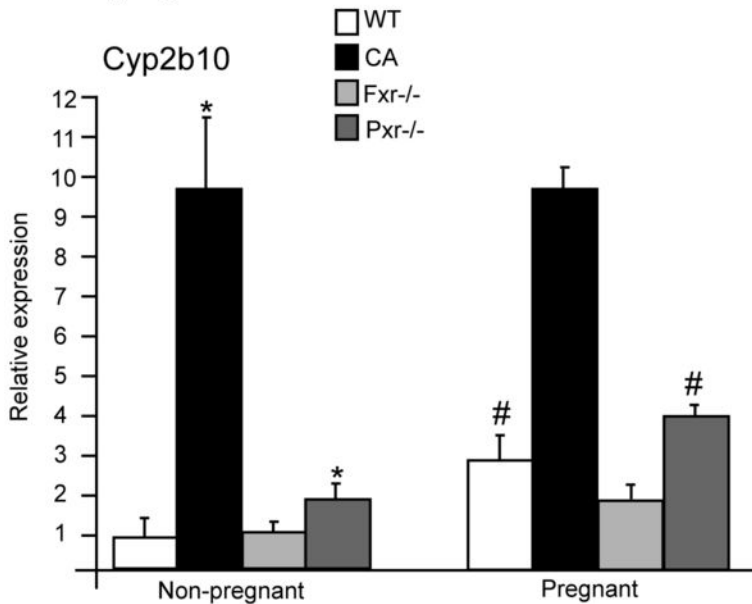

Supplement: figS3.pdf [file figS3.pdf]
